# Supplementary material
Source: ML conference proceedings conference paper supplement (https://proceedings.neurips.cc/paper_files/paper/2016/hash/d09bf41544a3365a46c9077ebb5e35c3-Abstract.html)
Supplement: Supplementary file [file d09bf41544a3365a46c9077ebb5e35c3-Supplemental.zip]

## A Appendix

For notational convenience, let

$$Y_t^k(\mathbf{x}) = \sum_{\mathbf{z}: A_t^k \mathbf{z} = b_t^k \pmod{2}} p_\theta(\mathbf{x}, \mathbf{z})$$

denote a random variable representing the projected marginal likelihood, where the randomness is over the choice of the matrices  $A_t^k$ ,  $b_t^k$ , and

$$\delta_t^{k, \mathcal{Q}}(\mathbf{x}) = \min_{q \in \mathcal{Q}} D_{KL}(q_\phi(\mathbf{z}|\mathbf{x}) || R_{A_t^k, b_t^k}^k[p_\theta(\mathbf{z}|\mathbf{x})]).$$

denote the minimum KL-divergence within an approximating family of distributions  $\mathcal{Q}$  and the true posterior projected using  $A_t^k$ ,  $b_t^k$ .

Before proving Theorem 3.1 and Theorem 3.2, we first extend an important result from earlier work to our setting.

### A.1 Extension of Theorem 2 from [Hsu et al., 2016]

**Lemma A.1.** *For any  $\Delta > 0$ , let  $T \geq \frac{1}{\alpha} (\log(2n/\Delta))$ . Let  $A_t^k \in \{0, 1\}^{k \times n} \stackrel{iid}{\sim} \text{Bernoulli}(\frac{1}{2})$  and  $b_t^k \in \{0, 1\}^k \stackrel{iid}{\sim} \text{Bernoulli}(\frac{1}{2})$  for  $k \in \{0, 1, \dots, n\}$  and  $t \in \{1, \dots, T\}$ . Let  $\mathcal{D}$  denote the set of degenerate (deterministic) probability distributions. Then there exists a positive constant  $\alpha$  such that with probability at least  $(1 - \Delta)$*

$$p_\theta(\mathbf{x})/32 \leq \sum_{k=0}^n \exp\left(\text{Median}_{t \in [T]} \left(-\delta_t^{k, \mathcal{D}}(\mathbf{x}) + \log Y_t^k(\mathbf{x})\right)\right) 2^{k-1} \leq 32p_\theta(\mathbf{x}) \quad (8)$$

i.e., it is a 32-approximation to  $p_\theta(\mathbf{x})$ .

*Proof.* By definition,

$$\delta_t^{k, \mathcal{D}}(\mathbf{x}) = \min_{q \in \mathcal{D}} \sum_{\mathbf{z}: A_t^k \mathbf{z} = b_t^k \pmod{2}} q_\phi(\mathbf{z}|\mathbf{x}) [\log q_\phi(\mathbf{z}|\mathbf{x}) - \log p_\theta(\mathbf{x}, \mathbf{z})] + \log Y_t^k(\mathbf{x}).$$

For a degenerate distribution,  $q \in \mathcal{D}$ , the entropy is zero and all its mass is at a single point. Hence,

$$\begin{aligned} \delta_t^{k, \mathcal{D}}(\mathbf{x}) &= -\max_{q \in \mathcal{D}} \sum_{\mathbf{z}: A_t^k \mathbf{z} = b_t^k \pmod{2}} q_\phi(\mathbf{z}|\mathbf{x}) \cdot \log p_\theta(\mathbf{x}, \mathbf{z}) + \log Y_t^k(\mathbf{x}) \\ &= -1 \cdot \max_{\mathbf{z}: A_t^k \mathbf{z} = b_t^k \pmod{2}} \log p_\theta(\mathbf{x}, \mathbf{z}) + \log Y_t^k(\mathbf{x}). \end{aligned}$$

Rearranging terms,

$$-\delta_t^{k, \mathcal{D}}(\mathbf{x}) + \log Y_t^k(\mathbf{x}) = \max_{\mathbf{z}: A_t^k \mathbf{z} = b_t^k \pmod{2}} \log p_\theta(\mathbf{x}, \mathbf{z}).$$

Substituting the above expression into Eq. (8), we get

$$\begin{aligned} &\sum_{k=0}^n \exp\left(\text{Median}\left(\max_{\mathbf{z}: A_1^k \mathbf{z} = b_1^k \pmod{2}} \log p_\theta(\mathbf{x}, \mathbf{z}), \dots, \max_{\mathbf{z}: A_T^k \mathbf{z} = b_T^k \pmod{2}} \log p_\theta(\mathbf{x}, \mathbf{z})\right)\right) 2^{k-1} \\ &= \sum_{k=0}^n \text{Median}\left(\exp\left(\max_{\mathbf{z}: A_1^k \mathbf{z} = b_1^k \pmod{2}} \log p_\theta(\mathbf{x}, \mathbf{z})\right), \dots, \exp\left(\max_{\mathbf{z}: A_T^k \mathbf{z} = b_T^k \pmod{2}} \log p_\theta(\mathbf{x}, \mathbf{z})\right)\right) 2^{k-1} \\ &= \sum_{k=0}^n \text{Median}\left(\max_{\mathbf{z}: A_1^k \mathbf{z} = b_1^k \pmod{2}} p_\theta(\mathbf{x}, \mathbf{z}), \dots, \max_{\mathbf{z}: A_T^k \mathbf{z} = b_T^k \pmod{2}} p_\theta(\mathbf{x}, \mathbf{z})\right) 2^{k-1}. \end{aligned}$$

The result then follows directly from Theorem 1 from [Ermon et al., 2013b].  $\square$

## A.2 Proof of Theorem 3.1: Upper bound based on mean aggregation

From the non-negativity of KL divergence we have that for any  $q \in \mathcal{Q}$ ,

$$\begin{aligned} \log Y_t^k(\mathbf{x}) &\geq \sum_{\mathbf{z}: A_t^k \mathbf{z} = b_t^k \pmod 2} q_\phi(\mathbf{z}|\mathbf{x}) [\log p_\theta(\mathbf{x}, \mathbf{z}) - \log q_\phi(\mathbf{z})] \\ &\geq \max_{q \in \mathcal{Q}} \left( \sum_{\mathbf{z}: A_t^k \mathbf{z} = b_t^k \pmod 2} q_\phi(\mathbf{z}|\mathbf{x}) [\log p_\theta(\mathbf{x}, \mathbf{z}) - \log q_\phi(\mathbf{z})] \right) \end{aligned}$$

Exponentiating both sides,

$$Y_t^k(\mathbf{x}) \geq \exp \left( \max_{q \in \mathcal{Q}} \left( \sum_{\mathbf{z}: A_t^k \mathbf{z} = b_t^k \pmod 2} q_\phi(\mathbf{z}|\mathbf{x}) [\log p_\theta(\mathbf{x}, \mathbf{z}) - \log q_\phi(\mathbf{z})] \right) \right) \stackrel{\text{def}}{=} \gamma_t^k(\mathbf{x}). \quad (9)$$

Taking an expectation on both sides w.r.t  $A_t^k, b_t^k$ ,

$$\mathbb{E}_{A_t^k, b_t^k} [Y_t^k(\mathbf{x})] \geq \mathbb{E}_{A_t^k, b_t^k} [\gamma_t^k(\mathbf{x})]$$

Using Lemma 3.1, we get:

$$\mathbb{E}_{A_t^k, b_t^k} [\gamma_t^k(\mathbf{x})] \leq 2^{-k} p_\theta(\mathbf{x})$$

## A.3 Proof of Theorem 3.2: Upper bound based on median aggregation

From Markov's inequality, since  $Y_t^k(\mathbf{x})$  is non-negative,

$$\mathbb{P} [Y_t^k(\mathbf{x}) \geq c \mathbb{E}[Y_t^k(\mathbf{x})]] \leq \frac{1}{c}.$$

Using Lemma 3.1,

$$\mathbb{P} [Y_t^k(\mathbf{x}) 2^k \geq c p_\theta(\mathbf{x})] \leq \frac{1}{c}.$$

Since  $Y_t^k(\mathbf{x}) \geq \gamma_t^k(\mathbf{x})$  from Eq. (9), setting  $c = 4$  and  $k = k^*$  we get

$$\mathbb{P} [\gamma_t^{k^*}(\mathbf{x}) 2^{k^*} \geq 4 p_\theta(\mathbf{x})] \leq \frac{1}{4}. \quad (10)$$

From Chernoff's inequality, if for any non-negative  $\epsilon \leq 0.5$ ,

$$\mathbb{P} [\gamma_t^{k^*}(\mathbf{x}) 2^{k^*} \geq 4 p_\theta(\mathbf{x})] \leq \left( \frac{1}{2} - \epsilon \right) \quad (11)$$

then,

$$\mathbb{P} [4 p_\theta(\mathbf{x}) \leq \text{Median}(\gamma_1^{k^*}(\mathbf{x}), \dots, \gamma_T^{k^*}(\mathbf{x})) 2^{k^*}] \leq \exp(-2\epsilon^2 T) \quad (12)$$

From Eq. (10) and Eq. (11),  $\epsilon \leq 0.25$ . Hence, taking the complement of Eq. (12) and given a positive constant  $\alpha \leq 0.125$  such that for any  $\Delta > 0$ , if  $T \geq \frac{1}{\alpha} \log(2n/\Delta) \geq \frac{1}{\alpha} \log(1/\Delta)$ , then

$$\mathbb{P} [4 p_\theta(\mathbf{x}) \geq \text{Median}(\gamma_1^{k^*}(\mathbf{x}), \dots, \gamma_T^{k^*}(\mathbf{x})) 2^{k^*}] \geq 1 - \Delta.$$

## A.4 Proof of Theorem 3.2: Lower bound based on median aggregation

Since the conditions of Lemma A.1 are satisfied, we know that Eq. (8) holds with probability at least  $1 - \delta$ . Also, since the terms in the sum are non-negative we have that the maximum element is at least  $1/(n+1)$  of the sum. Hence,

$$\max_k \exp \left( \text{Median} \left( -\delta_1^{k, \mathcal{D}}(\mathbf{x}) + \log Y_1^k(\mathbf{x}), \dots, -\delta_T^{k, \mathcal{D}}(\mathbf{x}) + \log Y_T^k(\mathbf{x}) \right) \right) 2^{k-1} \geq \frac{1}{32} p_\theta(\mathbf{x}) \frac{1}{n+1}. \quad (13)$$

Therefore, there exists  $k^*$  (corresponding to the arg max in Eq. (13)) such that

$$\text{Median} \left( -\delta_1^{k^*, \mathcal{D}}(\mathbf{x}) + \log Y_1^{k^*}(\mathbf{x}), \dots, -\delta_T^{k^*, \mathcal{D}}(\mathbf{x}) + \log Y_T^{k^*}(\mathbf{x}) \right) + (k^* - 1) \log 2 \geq -\log 32 + \log p_\theta(\mathbf{x}) - \log(n+1).$$

Since  $\mathcal{D} \subseteq \mathcal{Q}$ , we also have

$$\delta_t^{k^*, \mathcal{Q}}(\mathbf{x}) \leq \delta_t^{k^*, \mathcal{D}}(\mathbf{x}).$$

Thus,

$$\text{Median}\left(-\delta_1^{k^*, \mathcal{Q}}(\mathbf{x}) + \log Y_1^{k^*}(\mathbf{x}), \dots, -\delta_T^{k^*, \mathcal{Q}}(\mathbf{x}) + \log Y_T^{k^*}(\mathbf{x})\right) + (k^* - 1) \log 2 \geq -\log 32 + \log p_\theta(\mathbf{x}) - \log(n + 1).$$

From Eq. (5), note that

$$\begin{aligned} \log \gamma_t^k(\mathbf{x}) &= \max_{q \in \mathcal{Q}} \sum_{\mathbf{z}: A_t^k \mathbf{z} = b_t^k \bmod 2} q_\phi(\mathbf{z}|\mathbf{x}) (\log p_\theta(\mathbf{x}, \mathbf{z}) - \log q_\phi(\mathbf{z}|\mathbf{x})) \\ &= \max_{q \in \mathcal{Q}} \sum_{\mathbf{z}: A_t^k \mathbf{z} = b_t^k \bmod 2} q_\phi(\mathbf{z}|\mathbf{x}) (\log p_\theta(\mathbf{z}|\mathbf{x}) - \log q_\phi(\mathbf{z}|\mathbf{x})) + \log p_\theta(\mathbf{x}) \\ &= -\delta_t^{k, \mathcal{Q}}(\mathbf{x}) + \log Y_t^k(\mathbf{x}). \end{aligned}$$

Plugging in we get,

$$\text{Median}\left(\log \gamma_1^{k^*}(\mathbf{x}), \dots, \log \gamma_T^{k^*}(\mathbf{x})\right) + (k^* - 1) \log 2 \geq -\log 32 - \log(n + 1) + \log p_\theta(\mathbf{x})$$

and also

$$\text{Median}\left(\log \gamma_1^{k^*}(\mathbf{x}), \dots, \log \gamma_T^{k^*}(\mathbf{x})\right) + k^* \log 2 \geq -\log 32 - \log(n + 1) + \log p_\theta(\mathbf{x}).$$

with probability at least  $1 - \Delta$ .

$$\text{Median}\left(\gamma_1^{k^*}(\mathbf{x}), \dots, \gamma_T^{k^*}(\mathbf{x})\right) 2^{k^*} \geq \frac{p_\theta(\mathbf{x})}{32(n + 1)}.$$

Combining the lower and upper bounds, we get

$$4p_\theta(\mathbf{x}) \geq \mathcal{L}_{Md}^{k^*, T}(\mathbf{x}) \geq \frac{p_\theta(\mathbf{x})}{32(n + 1)}$$

with probability at least  $1 - 2\Delta$  by union bound by choosing a small enough value for  $\alpha$ .

## A.5 Proof of Theorem 3.1: Lower bound based on mean aggregation

We first prove a useful inequality relating to the mean and median of non-negative reals.

**Lemma A.2.** For a set of non-negative reals  $F = \{f_i\}_{i=1}^\ell$ ,

$$\frac{1}{\ell} \sum_{i=1}^\ell f_i \geq \frac{1}{2} \text{Median}(F).$$

*Proof.* Without loss of generality, we assume for notational convenience that elements in  $F$  are sorted by their indices, i.e.,  $f_1 \leq f_2 \leq \dots \leq f_\ell$ . By definition of median, we have for all  $i \in \{\lfloor \ell/2 \rfloor, \lfloor \ell/2 \rfloor + 1, \dots, \ell\}$

$$f_i \geq \text{Median}(F).$$

Adding all the above inequalities, we get

$$\sum_{i=\lfloor \ell/2 \rfloor}^\ell f_i \geq \left\lceil \frac{\ell}{2} \right\rceil \text{Median}(F).$$

Since all  $f_i$  are non-negative,

$$\sum_{i=1}^\ell f_i \geq \left\lceil \frac{\ell}{2} \right\rceil \text{Median}(F).$$

The median of non-negative reals is also non-negative, and hence,

$$\sum_{i=1}^\ell f_i \geq \frac{\ell}{2} \text{Median}(F)$$

finishing the proof.  $\square$

Substituting for  $F$  in the above lemma with  $\{\gamma_t^{k^*}(\mathbf{x})\}_{t=1}^T$ , we get

$$\frac{1}{T} \sum_{t=1}^T \gamma_t^{k^*}(\mathbf{x}) \geq \frac{1}{2} \text{Median}\left(\gamma_1^{k^*}(\mathbf{x}), \dots, \gamma_T^{k^*}(\mathbf{x})\right).$$

Now using the lower bound in Theorem 3.2, with probability at least  $1 - 2\Delta$ ,

$$\frac{1}{T} \sum_{t=1}^T \gamma_t^{k^*}(\mathbf{x}) \cdot 2^{k^*} \geq \frac{p_\theta(\mathbf{x})}{64(n + 1)}.$$
